# Supplementary material for: The Mental Well-Being of Italian Adolescents in the Last Decade through the Lens of the Dual Factor Model
Source: Children (Basel). 2022 Dec 16;9(12):1981. doi: 10.3390/children9121981 (PMC9777362; doi:10.3390/children9121981)
Supplement: Supplementary file 1 [file children-09-01981-s001.zip › children-2000623-supplementary.pdf]

# The mental well-being of Italian adolescents in the last decade through the lens of the Dual Factor Model.

## *Supplementary Material*

Michela Bersia<sup>1,2</sup>, Lorena Charrier<sup>1</sup>, Paola Berchialla<sup>3</sup>, Alina Cosma<sup>4,5</sup>, Rosanna Irene Comoretto<sup>1,\*</sup>, and Paola Dalmasso<sup>1</sup>.

<sup>1</sup> Department of Public Health and Pediatrics, University of Torino, Via Santena 5 bis, 10126 Torino, Italy

<sup>2</sup> Post Graduate School of Medical Statistics, University of Torino, Via Santena 5 bis, 10126 Torino, Italy

<sup>3</sup> Department of Clinical and Biological Sciences, University of Torino, Regione Gonzole 43, 10043 Orbassano, Italy

<sup>4</sup> Department of Sociology, Trinity College Dublin, 3 College Green, Ireland

<sup>5</sup> Sts Cyril and Methodius Faculty of Theology, Olomouc University Social Health Institute, Palacky University in Olomouc, Olomouc, Czech Republic

\* Correspondence: [rosannairene.comoretto@unito.it](mailto:rosannairene.comoretto@unito.it)

## Table of contents

|                                                                                                |   |
|------------------------------------------------------------------------------------------------|---|
| <b>Figure S1.</b> Results from the sensitivity analysis on PHC score using a cut-off of 8..... | 2 |
| <b>Figure S2.</b> The adopted frame of the Dual Factor Model for this work.....                | 3 |

**Figure S1.** Results from the sensitivity analysis on PHC score using a cut-off of 8.

| PHC2  | PHC score cut-off |         |         |
|-------|-------------------|---------|---------|
|       | >=8               | <8      | Total   |
| >=2   | 54,345            | 4,522   | 58,867  |
| <2    | 6,998             | 98,102  | 105,100 |
| Total | 61,343            | 102,624 | 163,967 |

Gold standard was defined as PHC2 = >=2 (>=2 psychological health complaints more than once a week)

Results of the sensitivity analysis

|                           |                   | Mean   | 95% Confidence Interval] |        |
|---------------------------|-------------------|--------|--------------------------|--------|
| Prevalence                | Pr (A)            | 35.9%  | 35.7%                    | 36.1%  |
| Sensitivity               | Pr (+ A)          | 92.3%  | 92.1%                    | 92.5%  |
| Specificity               | Pr (- N)          | 93.3%  | 93.2%                    | 93.5%  |
| ROC area                  | (Sens. + Spec.)/2 | 0.93   | 0.93                     | 0.93   |
| Likelihood ratio (+)      | Pr (+ A)/Pr (+ N) | 13.86  | 13.55                    | 14.18  |
| Likelihood ratio (-)      | Pr (- A)/Pr (- N) | 0.08   | 0.08                     | 0.08   |
| Odds ratio                | LR (+)/LR (-)     | 168.47 | 162.06                   | 175.15 |
| Positive predictive value | Pr (A +)          | 88.6%  | 88.3%                    | 88.8%  |
| Negative predictive value | Pr (N -)          | 95.6%  | 95.5%                    | 95.7%  |

Legend: PHC2: ≥2 symptoms more than once a week; PHC score cut-off: dichotomization of the continuous PHC variable adopting a cut-off value of 8.

**Figure S2.** The adopted frame of the Dual Factor Model for this work.

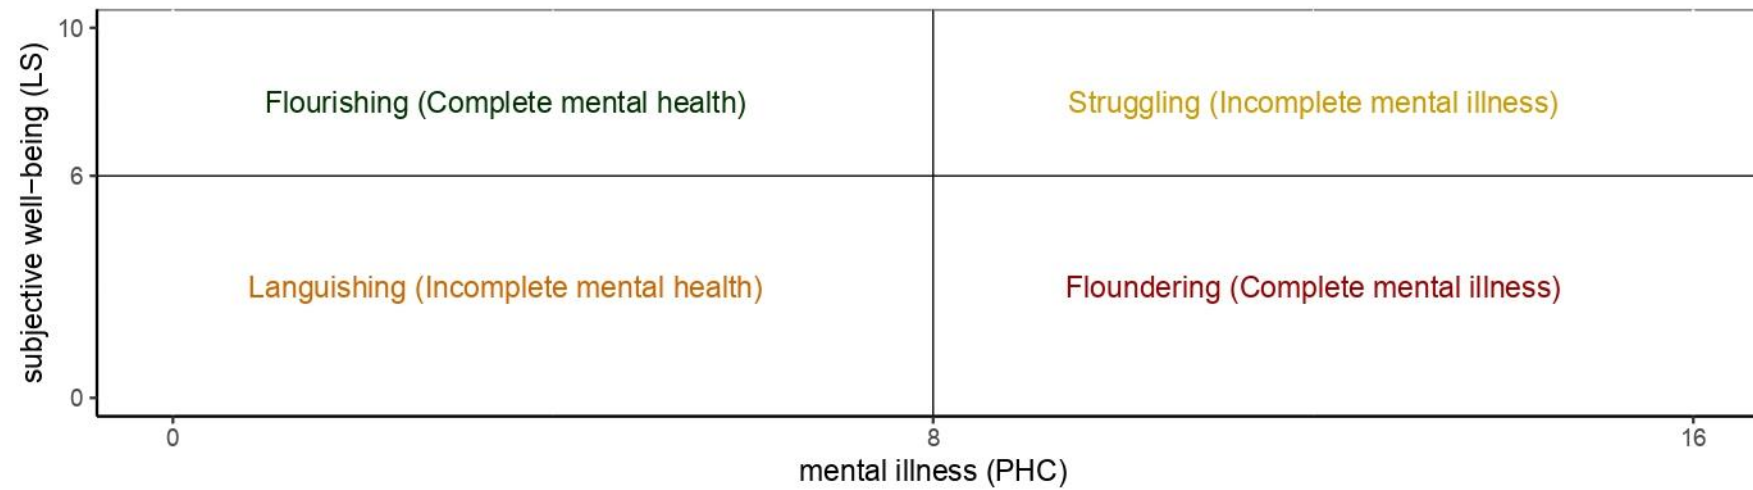

Abbreviations. LS: life satisfaction; PHC: psychological health complaints.
